# Supplementary material for: Electrolyte-driven modulation of charge storage mechanisms in Co metal–organic frameworks for advanced supercapacitors
Source: Royal Society of Chemistry journal article supplement (doi:10.1039/d6ra01795a), 2026-04-15
Supplement: d6ra01795a1.pdf [file d6ra01795a1.pdf]

**Supplementary Information**  
**Electrolyte-Driven Modulation of Charge Storage Mechanisms in Co**  
**Metal–Organic Frameworks for Advanced Supercapacitors**

Mrinalini Sharma<sup>1</sup>, Manas Nasit<sup>1</sup>, Nitin Kumar Gautam<sup>1</sup>, Shruti Lavania<sup>1</sup>, Saurabh Dalela<sup>2</sup>, P.A Alvi<sup>3</sup>, Nagih M. Shalaan<sup>4</sup>, Ranjeet Kumar Brajpuriya<sup>1†</sup>, Aditya Sharma<sup>1</sup>,  
Shalendra Kumar<sup>1\*</sup>

<sup>1</sup>Department of Physics, School of Advanced Engineering, UPES, Dehradun 248007, India

<sup>2</sup>Department of Pure & Applied Physics, University of Kota, Kota, Rajasthan, 324005, India

<sup>3</sup>Department of Physical Science, Banasthali Vidyapith, Banasthali, Rajasthan, 304022, India

<sup>4</sup>Department of Physics, College of Science, King Faisal University, P.O. Box 400, Al-Ahsa 31982,  
Saudi Arabia

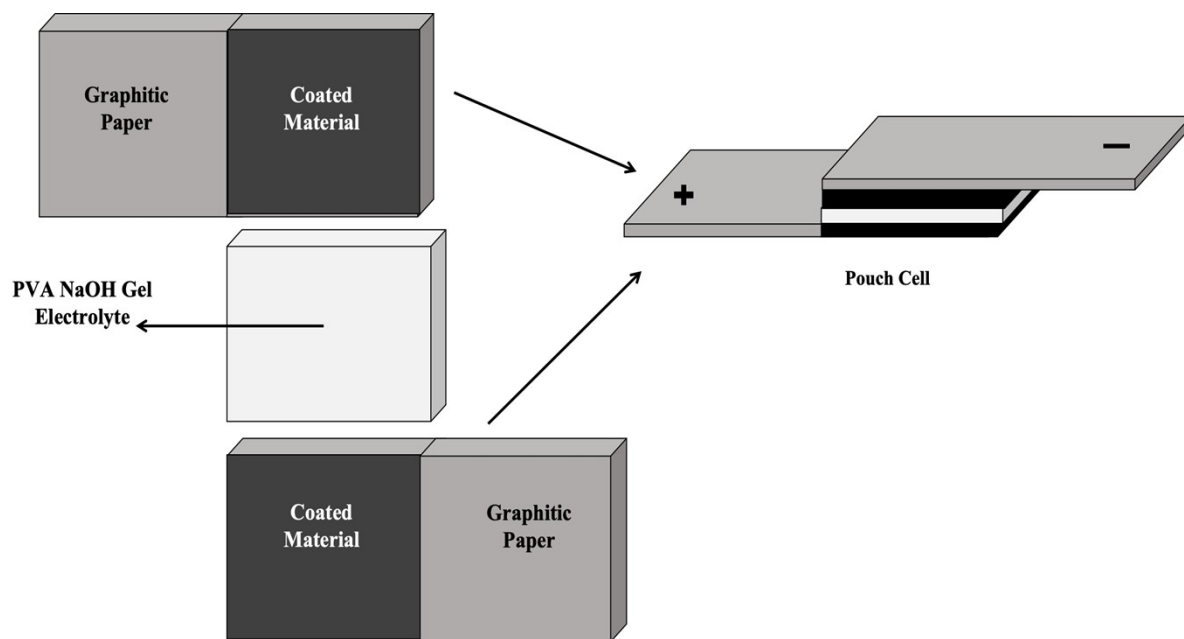

**Figure. S1.** Schematic illustration of Co-MOF Pouch Cell.

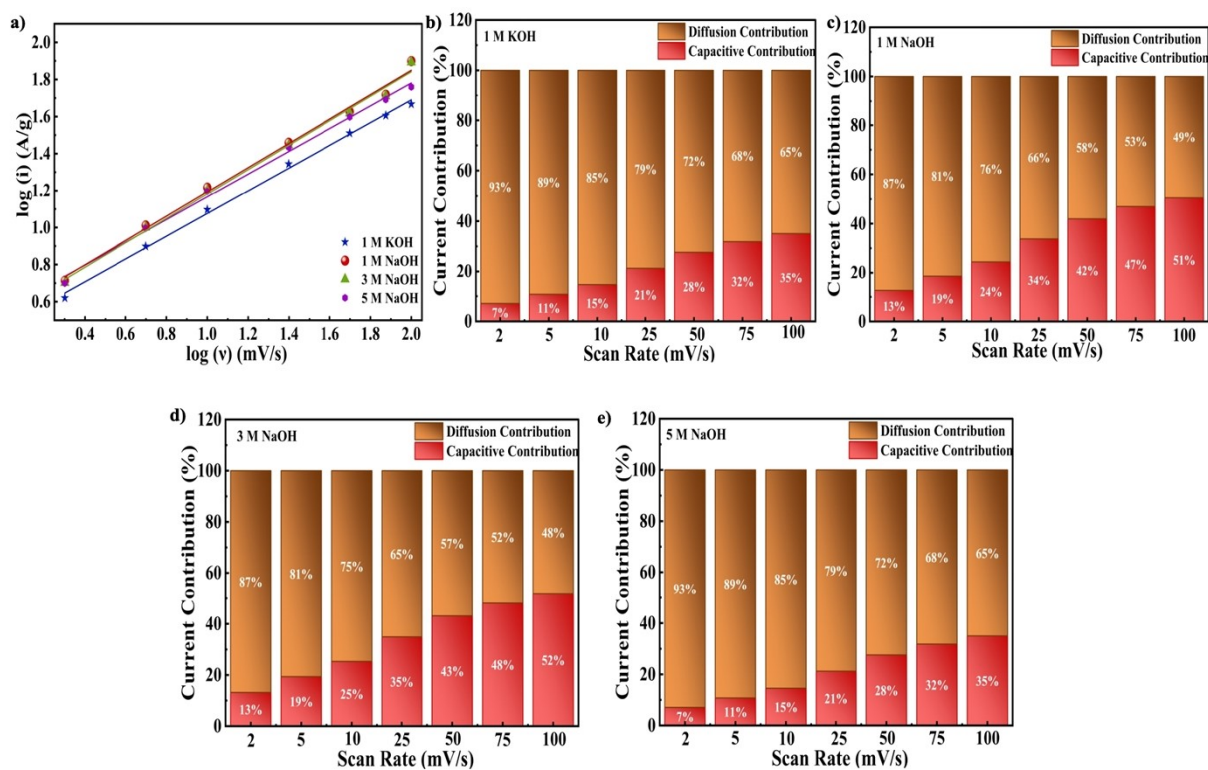

**Fig. S2 (a)** Log (i) vs Log (v) Analysis of Co-MOF in 1M KOH and 1M NaOH electrolytes at different molarities (3M NaOH and 5M NaOH), Analysis of Surface-controlled and Diffusion-controlled charge storage in Co-MOF for **(b)** 1M KOH **(c)** 1M NaOH **(d)** 3M NaOH **(e)** 5M NaOH

**Table:****Table S1.** Comparison of Electrochemical behaviour of Swagelok & Pouch cell using CV, GCD and Capacitance retention (%).

| <b>Device</b>     | <b>CV<br/>(at 2mV/s)</b> | <b>GCD<br/>(at 0.25 A/g)</b> | <b>Retention<br/>(%)</b> |
|-------------------|--------------------------|------------------------------|--------------------------|
| <b>Swagelok</b>   | 37.7 F/g                 | 14.9 F/g                     | 43.96%                   |
| <b>Pouch Cell</b> | 21.42                    | 1.68 F/g                     | 41.2 %                   |

**Table S2.** Influence of bending angle on the  $C_{sp}$  of the flexible device.

| <b>Bending Angle( °)</b> | <b>Specific Capacitance(F/g)</b> |
|--------------------------|----------------------------------|
| 0                        | 3.17                             |
| 45                       | 5.64                             |
| 90                       | 11.35                            |
